# Supplementary material for: The Protective Role of Decorin in Hepatic Metastasis of Colorectal Carcinoma
Source: PubMed Central journal article supplement (PMC7465536; doi:10.3390/biom10081199), 2020-08-18
Supplement: biomolecules-10-01199-s001.pdf [file biomolecules-10-01199-s001.pdf]

**Supplementary Table S1.** List of biopsy samples of CRC with liver metastasis.

| Patient ID | Sex    | Age | Grade: | T: | N: | M: | Stromal reaction in PT * | Growth pattern in LM ** |
|------------|--------|-----|--------|----|----|----|--------------------------|-------------------------|
| 1          | female | 61  | II     | 3  | 1  | x  | Intermediate             | Replacement             |
| 2          | female | 45  | I      | 3  | 1  | x  | Mature                   | Desmoplastic            |
| 3          | male   | 64  | II     | 3  | 1  | 1  | Immature                 | Desmoplastic            |
| 4          | female | 46  | II     | 3  | 0  | x  | Mature                   | Desmoplastic            |
| 5          | male   | 48  | II     | 4  | 2  | x  | Immature                 | Replacement             |
| 6          | female | 66  | II     | 4  | 1  | x  | Mature                   | Desmoplastic            |
| 7          | male   | 69  | II     | 3  | 0  | x  | Mature                   | Desmoplastic            |
| 8          | male   | 68  | II     | 3  | 2  | x  | Mature                   | Replacement             |
| 9          | male   | 52  | II     | 4  | 1  | 1  | Mature                   | Desmoplastic            |
| 10         | female | 56  | II     | 3  | 0  | x  | Mature                   | Desmoplastic            |
| 11         | female | 73  | II     | 3  | 0  | x  | Mature                   | Desmoplastic            |
| 12         | female | 69  | II     | 3  | 0  | 2  | Mature                   | Replacement             |
| 13         | male   | 69  | II     | 3  | 2  | 1  | Immature                 | Replacement             |
| 14         | female | 66  | II     | 3  | 1  | x  | Mature                   | Desmoplastic            |
| 15         | female | 53  | II     | 1  | 0  | x  | Intermediate             | Replacement             |
| 16         | female | 68  | II     | 3  | 2  | x  | Immature                 | Desmoplastic            |
| 17         | male   | 67  | III    | 3  | 2a | x  | Mature                   | Replacement             |
| 18         | female | 35  | II     | 3  | 2a | x  | Intermediate             | Desmoplastic            |
| 19         | male   | 66  | II     | 2a | 0  | x  | Intermediate             | Desmoplastic            |
| 20         | male   | 66  | III    | 3  | 2a | 1  | Intermediate             | Replacement             |
| 21         | male   | 59  | II     | 3  | 1  | 1  | Mature                   | Desmoplastic            |
| 22         | male   | 49  | III    | 3  | 1  | 1  | Mature                   | Desmoplastic            |
| 23         | male   | 51  | III    | 3  | 1  | 1  | Mature                   | Replacement             |
| 24         | female | 61  | II     | 4a | 2b | 1  | Mature                   | Replacement             |
| 25         | male   | 76  | III    | 3  | x  | x  | Mature                   | Desmoplastic            |
| 26         | male   | 57  | III    | 3  | 1  | x  | Intermediate             | Desmoplastic            |
| 27         | male   | 43  | II     | 1  | 1  | x  | Mature                   | Desmoplastic            |
| 28         | female | 59  | II     | 2  | 0  | x  | Mature                   | Desmoplastic            |
| 29         | female | 70  | II     | 3  | 0  | 1  | Mature                   | Desmoplastic            |
| 30         | male   | 56  | II     | 3  | 0  | x  | Mature                   | Desmoplastic            |

Abbreviations: PT: primary tumor, LM: liver metastasis.

\*Categorization as described by Ueno et al. *Ann Surg Oncol* (2015) 22:1504–1512

\*\* Categorization based on Höppener et al. *Clinical & Experimental Metastasis* (2019) 36:311–319

**Supplementary Table S2.** Scoring results of decorin immunostaining on TMA slides.

| <b>ID</b> | <b>Normal Average</b> | <b>Primer Average</b> | <b>Metastasis Average</b> | <b>SL Average</b> |
|-----------|-----------------------|-----------------------|---------------------------|-------------------|
| 1         | 50,14                 | 34,36                 | 49,14                     | 52,07             |
| 2         | 139,00                | 23,60                 | 16,48                     | 23,10             |
| 3         | 44,00                 | 68,85                 | 25,41                     | 88,34             |
| 4         | 30,05                 | 85,29                 | 60,91                     | 14,99             |
| 5         | 147,82                | 117,93                | 29,95                     | 38,68             |
| 6         | 188,57                | 97,89                 | 0,52                      | 18,51             |
| 7         | 41,05                 | 94,32                 | 17,97                     | 27,45             |
| 8         | 89,87                 | 37,64                 | 10,13                     | 6,93              |
| 9         | 104,82                | 33,57                 | 63,74                     | 37,89             |
| 10        | 96,74                 | 107,53                | 31,18                     | 61,25             |
| 11        | 141,67                | 81,25                 | 17,04                     | 114,37            |
| 12        | 56,66                 | 20,33                 | 24,22                     | 106,26            |
| 13        | 56,58                 | 53,60                 | 40,21                     | 12,01             |
| 14        | 72,15                 | 142,65                | 87,35                     | 32,19             |
| 15        | 23,05                 | 26,14                 | 31,46                     | 12,44             |
| 16        | 179,67                | 118,48                | 130,44                    | 116,08            |
| 17        | 101,71                | 138,33                | 65,67                     | 61,88             |
| 18        | 158,52                | 62,53                 | 122,16                    | 3,95              |
| 19        | 134,90                | 83,07                 | 77,92                     | 48,82             |
| 20        | 121,20                | 138,81                | 22,67                     | 75,26             |
| 21        | 199,89                | 201,10                | 71,82                     | 26,64             |
| 22        | 142,47                | 121,04                | 9,31                      | 71,06             |
| 23        | 54,96                 | 28,06                 | 55,75                     | 29,39             |
| 24        | 129,62                | 124,62                | 1,54                      | 70,77             |
| 25        | 84,20                 | 39,87                 | 7,06                      | 20,76             |
| 26        | 3,71                  | 10,18                 | 34,26                     | 6,86              |
| 27        | 101,64                | 83,69                 | 29,17                     | 5,68              |
| 28        | 79,30                 | 25,58                 | 32,77                     | 33,17             |
| 29        | 105,84                | 52,44                 | 65,51                     | 26,15             |
| 30        | 135,89                | 136,74                | 77,63                     | 36,13             |

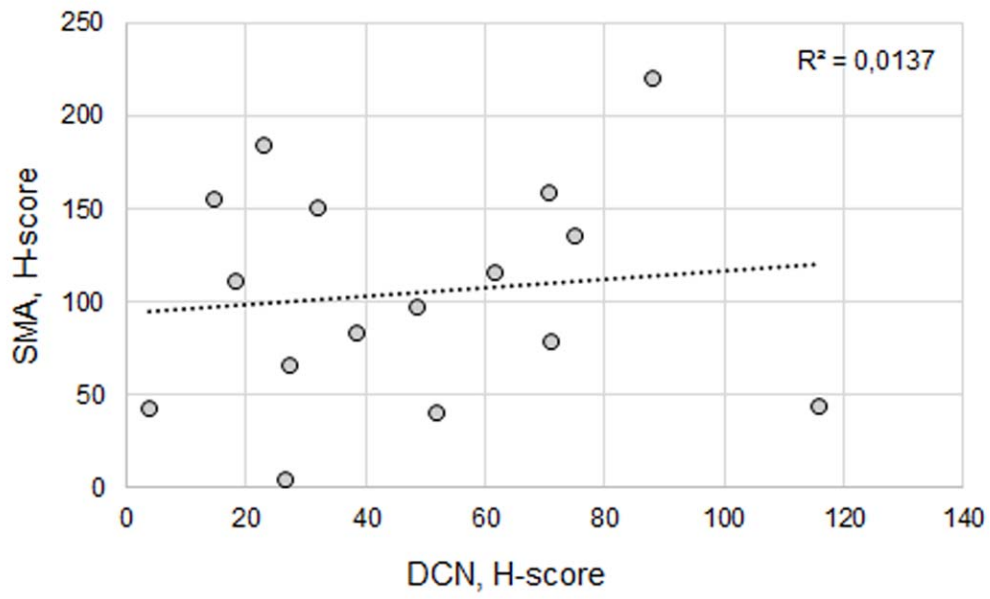

**Supplementary Figure S1.** Correlation between SMA and decorin staining intensities in surrounding liver samples of CRC metastases. Decorin score is independent from SMA score meaning that decorin content of liver samples are not proportional with its stroma abundance.
